# Supplementary material for: Influence of a Major Mountainous Landscape Barrier (Mount Cameroon) on the Spread of Metabolic (GSTe2) and Target-Site (Rdl) Resistance Alleles in the African Malaria Vector Anopheles funestus
Source: MDPI journal article supplement (doi:10.3390/genes11121492), 2020-12-11
Supplement: s1 [file s1]

**Table S1:** Detailed period (in years) of collections.

| Localities* | Seasons         |                   |                   |                 |
|-------------|-----------------|-------------------|-------------------|-----------------|
|             | Peak dry season | Mild rainy season | Peak rainy season | Mild dry season |
| Tiko        | 2014            | 2010              | 2013              | 2013            |
| Mutengene   | 2011            | 2011              | 2011              | 2011            |
| Meanja      | 2012            | 2010              | 2012              | 2012            |
| Likoko      | 2014            | 2010              | 2013              | 2013            |

Peak dry season: January – February;

Mild rainy season: March – April;

Peak rainy season: June – October;

Mild dry season: November – December.

\*Depending the surface area of selected localities, two to six neighbourhoods were visited for mosquito collections as follows: four (04) neighbourhoods in Tiko (including Likomba), six (06) in Mutengene, two (02) in Meanja and three(03) in Likoko.
