# Supplementary material for: Influence of a Major Mountainous Landscape Barrier (Mount Cameroon) on the Spread of Metabolic (GSTe2) and Target-Site (Rdl) Resistance Alleles in the African Malaria Vector Anopheles funestus
Source: Genes (Basel). 2020 Dec 11;11(12):1492. doi: 10.3390/genes11121492 (PMC7764057; doi:10.3390/genes11121492)
Supplement: Supplementary file 1 [file genes-11-01492-s001.zip]

Archive with 8 entries (8 files):
- Figure S1.tif
- Figure S2.tif
- Figure S3.tif
- Figure S4.tif
- Figure S5.tif
- Table S1.pdf
- Table S2.pdf
- Table S3.pdf
